# Supplementary material
Source: PubMed Central journal article supplement (PMC5679211)

## APPENDIX A. Sleep Quality Index Variables

(1) How much sleep do you get (hours): How much sleep do you get (hours)? The range is 1-11 and is truncated at 12 or more. Response of “I don’t know” or “refused” were considered missing: **sld010h**

(2) How long to fall asleep (min.), 0-50, 60 or more=60: **sld020m**

(3) How often do you snore?, 4-point likert scale: 0=never, 1=Rarely (1-2 nights/week), 2=Occasionally (3-4 nights/week), 3=Frequently (5 or more nights/week): **slq030**

(4) How often do you snort/stop breathing? 4-point likert scale: 0=never, 1=Rarely (1-2 nights/week), 2=Occasionally (3-4 nights/week), 3=Frequently (5 or more nights/week): **slq040**

(5) How often do you have trouble falling asleep? 5-point likert scale: 0=Never, 1=Rarely (1 time a month), 2=Sometimes (2-4 times a month), 3=Often (5-15 times a month), 4=Almost always (16-30 times a month) : **slq080**

(6) How often do you wake up during the night? 5-point likert scale: 0=Never, 1=Rarely (1 time a month), 2=Sometimes (2-4 times a month), 3=Often (5-15 times a month), 4=Almost always (16-30 times a month) : **slq090**

(7) How often do you wake up too early in the morning? 5-point likert scale: 0=Never, 1=Rarely (1 time a month), 2=Sometimes (2-4 times a month), 3=Often (5-15 times a month), 4=Almost always (16-30 times a month) : **slq100**

(8) How often do you feel unrested during the day? 5-point likert scale: 0=Never, 1=Rarely (1 time a month), 2=Sometimes (2-4 times a month), 3=Often (5-15 times a month), 4=Almost always (16-30 times a month) : **slq110**

(9) How often do you feel overly sleepy during the day? 5-point likert scale: 0=Never, 1=Rarely (1 time a month), 2=Sometimes (2-4 times a month), 3=Often (5-15 times a month), 4=Almost always (16-30 times a month) : **slq120**

(10) How often did you not get enough sleep? 5-point likert scale: 0=Never, 1=Rarely (1 time a month), 2=Sometimes (2-4 times a month), 3=Often (5-15 times a month), 4=Almost always (16-30 times a month) : **slq130**

(11) How often do you take pills to help you sleep? 5-point likert scale: 0=Never, 1=Rarely (1 time a month), 2=Sometimes (2-4 times a month), 3=Often (5-15 times a month), 4=Almost always (16-30 times a month) : **slq140**

(12) How often do you have leg jerks while sleeping? 5-point likert scale: 0=Never, 1=Rarely (1 time a month), 2=Sometimes (2-4 times a month), 3=Often (5-15 times a month), 4=Almost always (16-30 times a month) : **slq150**

(13) How often do you have leg cramps while sleeping? 5-point likert scale: 0=Never, 1=Rarely (1 time a month), 2=Sometimes (2-4 times a month), 3=Often (5-15 times a month), 4=Almost always (16-30 times a month) : **slq160**

(14) Do you have difficulty concentrating when tired? 5-point likert scale: 1=Don't do this activity for other reasons, 2=no difficulty, 3=Yes, a little difficulty, 4=Yes, moderate difficulty, 5=yes, extreme difficulty: **slq170**

(15) Do you have difficulty remembering when tired? 5-point likert scale: 1=Don't do this activity for other reasons, 2=no difficulty, 3=Yes, a little difficulty, 4=Yes, moderate difficulty, 5=yes, extreme difficulty: **slq180**

(16) Do you have difficulty eating when tired? 5-point likert scale: 1=Don't do this activity for other reasons, 2=no difficulty, 3=Yes, a little difficulty, 4=Yes, moderate difficulty, 5=yes, extreme difficulty: **slq190**

(17) Do you have difficulty with a hobby when tired? 5-point likert scale: 1=Don't do this activity for other reasons, 2=no difficulty, 3=Yes, a little difficulty, 4=Yes, moderate difficulty, 5=yes, extreme difficulty: **slq200**

(18) Do you have difficulty getting things done when tired? 5-point likert scale: 1=Don't do this activity for other reasons, 2=no difficulty, 3=Yes, a little difficulty, 4=Yes, moderate difficulty, 5=yes, extreme difficulty: **slq210**

(19) Do you have difficulty with finances when tired? 5-point likert scale: 1=Don't do this activity for other reasons, 2=no difficulty, 3=Yes, a little difficulty, 4=Yes, moderate difficulty, 5=yes, extreme difficulty: **slq220**

(20) Do you have difficulty with work when tired? 5-point likert scale: 1=Don't do this activity for other reasons, 2=no difficulty, 3=Yes, a little difficulty, 4=Yes, moderate difficulty, 5=yes, extreme difficulty: **slq230**

(21) Do you have difficulty using the phone when tired? 5-point likert scale: 1=Don't do this activity for other reasons, 2=no difficulty, 3=Yes, a little difficulty, 4=Yes, moderate difficulty, 5=yes, extreme difficulty: **slq240**

## APPENDIX B. Reduced factor analysis and factor loading plot

Reduced and rotated factor analysis results with 2-factor extraction:

factor loadings/uniqueeness

|         | Factor 1                         | Factor 2                               | Uniqueness |
|---------|----------------------------------|----------------------------------------|------------|
|         | Sleepiness and sleep disturbance | Poor sleep-related daytime dysfunction |            |
| sld020m | <b>0.46</b>                      | -0.04                                  | 0.76       |
| slq080  | <b>0.72</b>                      | 0.04                                   | 0.48       |
| slq090  | <b>0.76</b>                      | 0.05                                   | 0.43       |
| slq100  | <b>0.69</b>                      | 0.06                                   | 0.51       |
| slq110  | <b>0.73</b>                      | 0.23                                   | 0.42       |
| slq120  | <b>0.66</b>                      | 0.27                                   | 0.49       |
| slq130  | <b>0.74</b>                      | 0.20                                   | 0.42       |
| slq170  | 0.38                             | <b>0.60</b>                            | 0.50       |
| slq180  | 0.34                             | <b>0.54</b>                            | 0.59       |
| slq190  | 0.14                             | <b>0.43</b>                            | 0.79       |
| slq200  | 0.15                             | <b>0.54</b>                            | 0.69       |
| slq210  | 0.12                             | <b>0.58</b>                            | 0.65       |
| slq220  | 0.07                             | <b>0.56</b>                            | 0.68       |
| slq230  | -0.05                            | <b>0.44</b>                            | 0.80       |
| slq240  | 0.14                             | <b>0.53</b>                            | 0.70       |

Bolded factor loadings are >0.40 and considered significant. Factors are labelled based on highest loadings on measured items.

### Factor loading plot

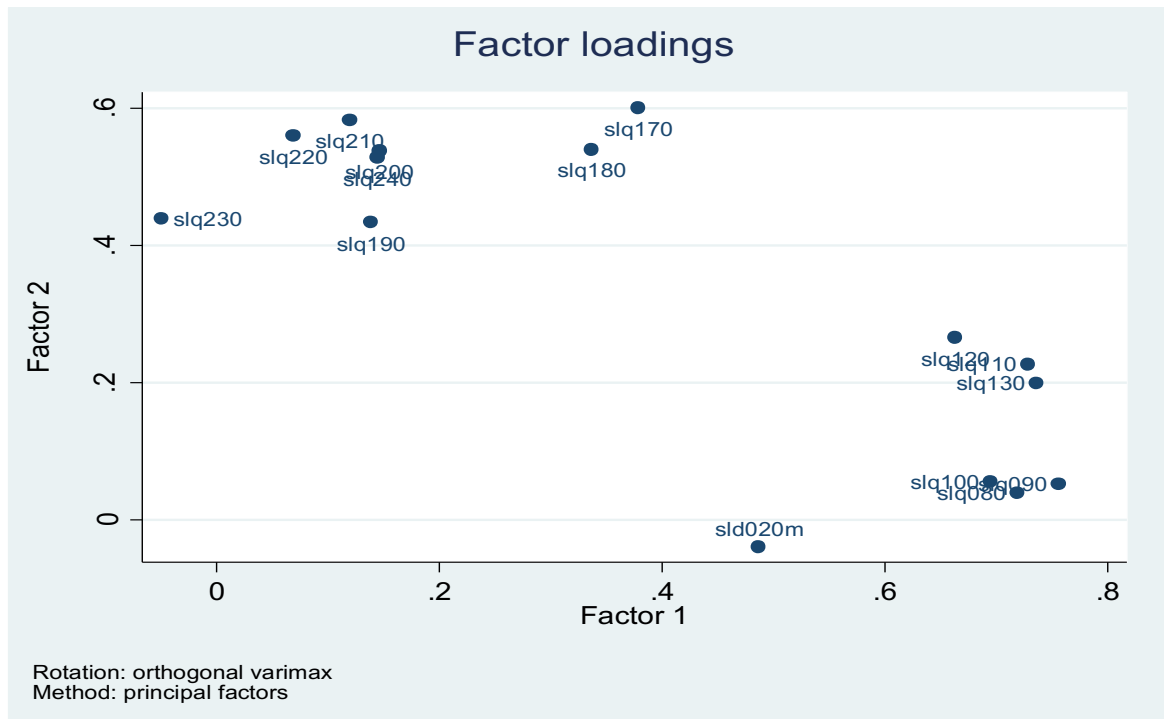

Supplement: NIHMS902263-supplement-Supplement.pdf [file NIHMS902263-supplement-Supplement.pdf]
